# Supplementary material for: Hypermethylated long noncoding RNA MEG3 promotes the progression of gastric cancer
Source: publisher site journal article supplement (doi:10.18632/aging.102309), 2019-10-04
Supplement: Supplementary file [file aging-v11i19-102309-supplementary-material-SD1.pdf]

# SUPPLEMENTARY FIGURES

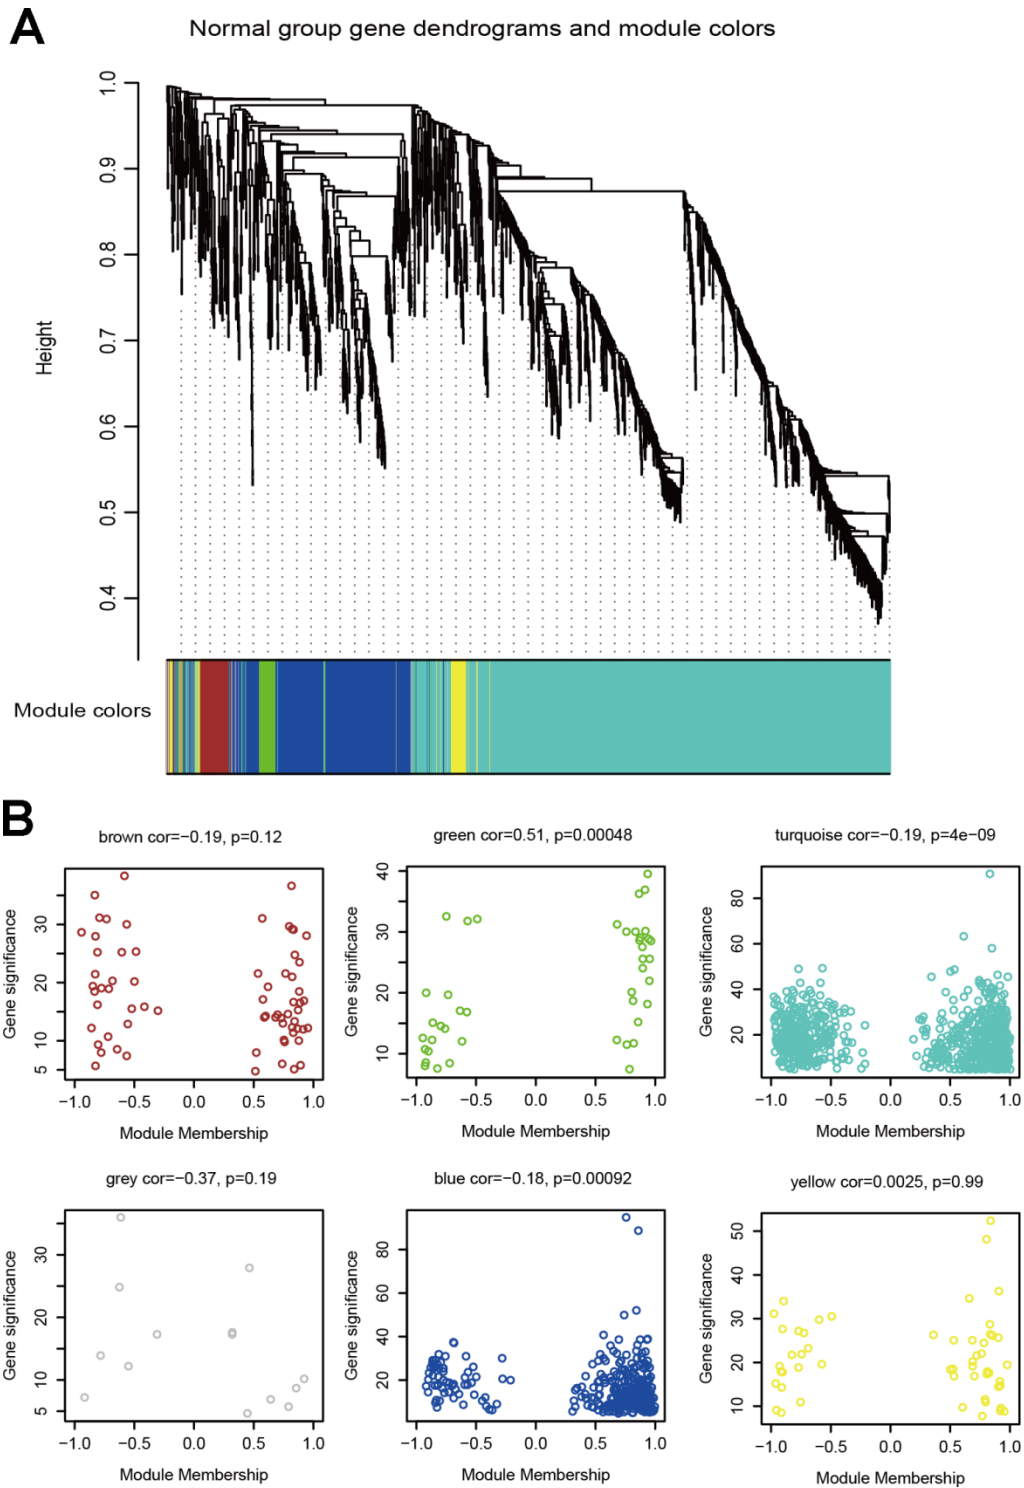

**Supplementary Figure 1. WGCNA analysis for normal tissues. (A)** Hierarchical cluster analysis showed coexpression clusters for normal tissues. **(B)** The details of each module for the normal group.

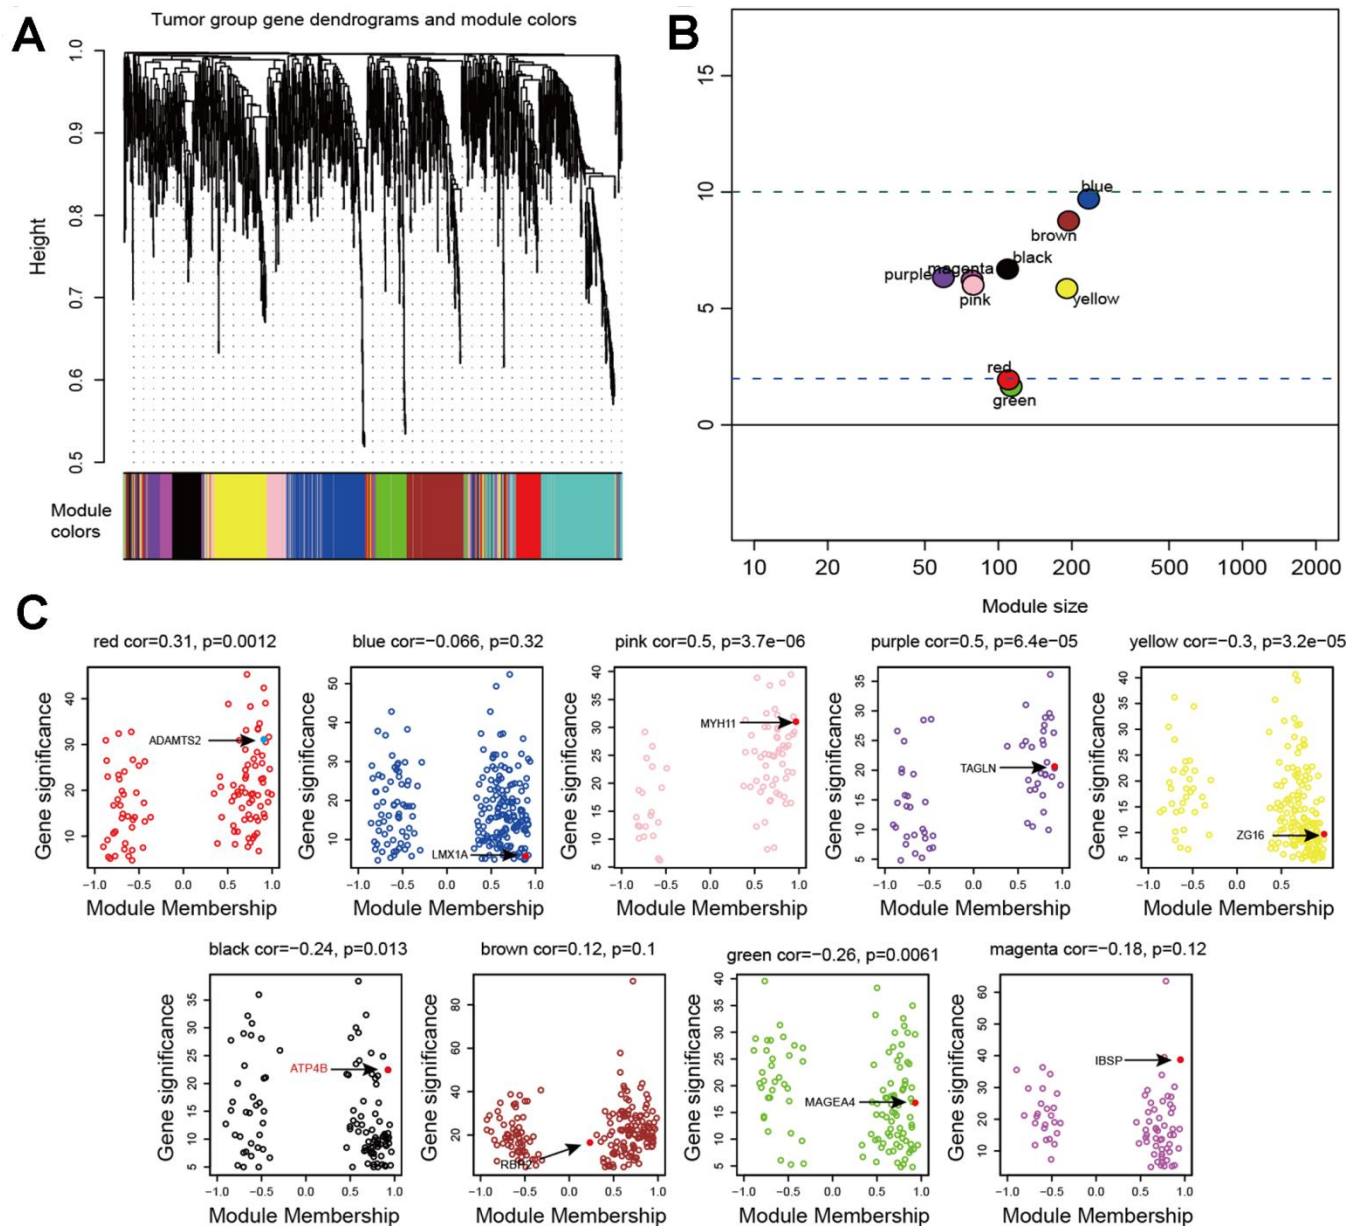

**Supplementary Figure 2. WGCNA analysis for tumor tissues.** (A) Hierarchical cluster analysis showed coexpression clusters for tumor tissues. (B) The size of each module for GC tissues. (C) The details of each module for the tumor group and marked hub gene for each module.
