# Supplementary material for: Hypermethylated long noncoding RNA MEG3 promotes the progression of gastric cancer
Source: publisher site journal article supplement (doi:10.18632/aging.102309), 2019-10-04
Supplement: Supplementary file [file aging-v11i19-102309-supplementary-material-SD2.pdf]

## SUPPLEMENTARY TABLES

**Supplementary Table 1. Correlation between MEG3 expression and clinicopathological features in gastric cancer (GC) (n=30).**

| Characteristics          | Total | High expression | Low expression | P value  |
|--------------------------|-------|-----------------|----------------|----------|
| Sex                      |       |                 |                |          |
| Male                     | 16    | 7               | 9              | 0.7321   |
| Female                   | 14    | 7               | 7              |          |
| Age(years)               |       |                 |                |          |
| <45                      | 12    | 5               | 7              | 0.4561   |
| ≥45                      | 18    | 10              | 8              |          |
| Extrathyroidal extension |       |                 |                |          |
| Yes                      | 14    | 7               | 7              | 0.7321   |
| No                       | 16    | 9               | 7              |          |
| TNM staging              |       |                 |                |          |
| I-II                     | 10    | 7               | 3              | 0.0177*  |
| III-IV                   | 20    | 5               | 15             |          |
| Lymph node metastasis    |       |                 |                |          |
| Yes                      | 13    | 3               | 10             | 0.0235*  |
| No                       | 17    | 11              | 6              |          |
| Multicentricity          |       |                 |                |          |
| Yes                      | 11    | 5               | 6              | 0.7048   |
| No                       | 19    | 10              | 9              |          |
| Tumor size (cm)          |       |                 |                |          |
| <5                       | 11    | 7               | 4              | 0.0072** |
| ≥5                       | 19    | 3               | 16             |          |

\* $P < 0.05$ , \*\* $P < 0.01$

**Supplementary Table 2. qRT-PCR and MSP Primer.**

| Gene        | Primer name | Sequence                               |
|-------------|-------------|----------------------------------------|
| MEG3        | Forward     | 5'- CTCCCCTTCTAGCGCTCACG-3'            |
|             | Reverse     | 5'- CTAGCCGCCGTCTATACTACCGGCT-3'       |
| MEG3-M-MSP  | Forward     | 5'- GCGAATTATTATTTATATAGCCTTC-3'       |
|             | Reverse     | 5'- TCACGCGCTACGAAGGGAAACG-3'          |
| MEG3-U-MSP  | Forward     | 5'- GTGAGGTGTTATTACCGTATAGTTTGG-3'     |
|             | Reverse     | 5'- TTCACACATACAGGTTCCAAACAAT-3'       |
| miR-181a-5p | Forward     | 5'-ACACTCCAGCTGGGAACATTCAACGCTGTCCG-3' |
|             | Reverse     | 5'-TGGTGTCGTGGAGTCG-3'                 |
| ATP4B       | Forward     | 5'- AGGAGTTCCAGCGTTACTGC -3'           |
|             | Reverse     | 5'- GGTCTTGGTAGTCCGGTGTG -3'           |
| U6          | Forward     | 5'-GCTCGCTTCGGCAGCACAT-3'              |
|             | Reverse     | 5'-AAAATATGGAACGCTTCACG-3'             |
| GAPDH       | Forward     | 5'-GGAGCGAGATCCCTCCAAAAT-3'            |
|             | Reverse     | 5'-GGCTGTTGTCATACTTCTCATGG-3'          |
